# Supplementary material for: Survival of Cervical Cancer Patients in Brunei Darussalam: 2002-2017
Source: Research Square preprint supplement (doi:10.21203/rs.3.rs-148839/v1), 2021-01-27
Supplement: Supplementary file 1 [file 5c7a20540f4af6f489632800.docx]

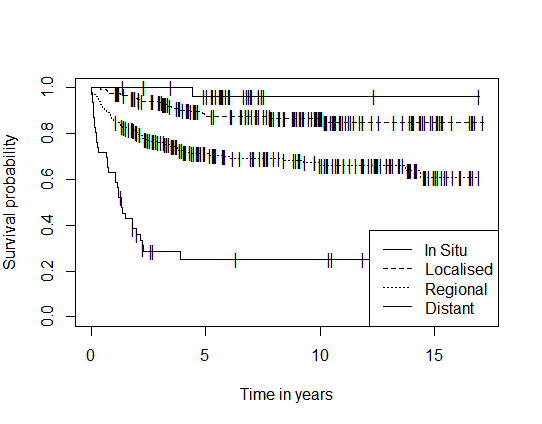


**Supplementary Figure 1 (S1): Kaplan-Meier Survival Curve of Cervical Cancer Patients by SEER Staging**


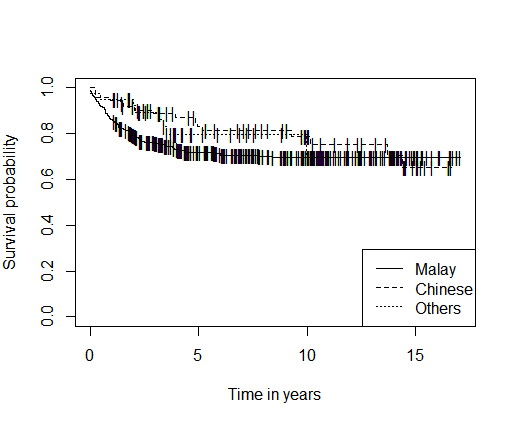


**Supplementary Figure 2 (S2): Kaplan-Meier Survival Curve of Cervical Cancer Patients by Ethnic Groups**


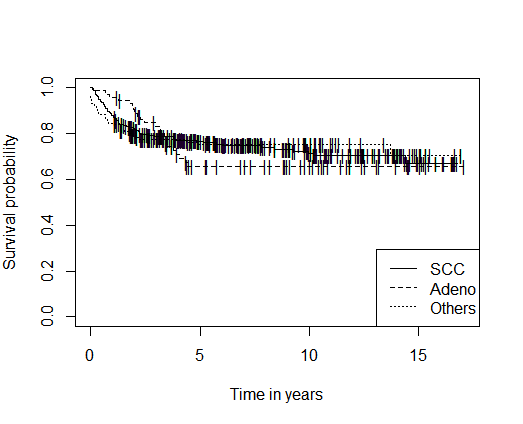


**Supplementary Figure 3 (S3): Kaplan-Meier Survival Curve of Cervical Cancer Patients by Cancer Histopathology**
